# Supplementary material for: CNT-anchored cellulose fluorescent nanofiber membranes as a fluorescence sensor for Cu2+ and Cr3+
Source: Royal Society of Chemistry journal article supplement (doi:10.1039/c7ay01994g), 2017-01-01
Supplement: c7ay01994g1.pdf [file c7ay01994g1.pdf]

Electronic Supporting Information for

## CNTs-anchored Cellulose Fluorescent Nanofiber Membranes as Fluorescence Sensor for $\text{Cu}^{2+}$ and $\text{Cr}^{3+}$

Yao Gu<sup>1</sup>, Meiling Wang<sup>2\*</sup>, Guizhen Li<sup>1</sup>

<sup>1</sup>Guangxi Zhuang Autonomous Region Forestry Research Institute, Nanning 530002, China; <sup>2</sup>Key Laboratory of Materials Physics, and Anhui Key Laboratory of Nanomaterials and Nanostructures, Institute of Solid State Physics, Chinese Academy of Sciences, Hefei, 230031, China

\*To whom correspondence should be addressed. E-mail: [mlw@issp.ac.cn](mailto:mlw@issp.ac.cn)

### Part S1 Details of the fluorescence spectra measurement conditions.

Fluorescence spectra measurements were carried out on a FluoroMax-4 fluorescence spectrometer (Horiba Jobin Yvon Inc., France). For the fluorescence measurements, the nanofiber film was inserted into the quartz cell with its surface facing the excitation light source and the cell was fixed on the sample holder of the spectrophotometer. The position of the film was kept constant during measurements to ensure the detection without interference of sample angle-change. 2 ml DI-water or varied concentrations of  $\text{Cu}^{2+}$  or  $\text{Cr}^{3+}$  in DI-water were added, and the fluorescence spectra were recorded. After each measurement, higher concentrations of metal solutions were used. Excitation and emission slits were all set at 8.0 nm with excitation at 470 nm.

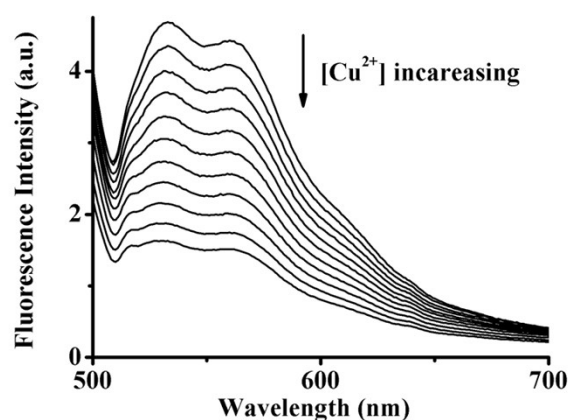

**Fig. S1** Fluorescence spectra of the 1,4-DHAQ-doped CNTs-anchored CL fluorescent nanofiber membrane in different concentrations of  $\text{Cu}^{2+}$  polluted lake waters.
